# Supplementary material for: Research on the Current Status of Pharmacists’ Professional Functions in Hospitals and Factors Influencing Their Improvement and Expansion
Source: Research Square preprint supplement (doi:10.21203/rs.3.rs-8259359/v1), 2025-12-08
Supplement: Supplementary file 1 [file ef3e1f739a62368937229b29.xlsx]

## Sheet: Table1
Table 1. Comparison of the Contribution of Each Medical Profession (per 100 Beds) to Ward Pharmaceutical Care Fee I Filing
Table 1A
Year2021	Odds ratio	Lower 95% CI	Upper 95% CI	Estimate	p-value (Prob > Chi-Square)
Number of pharmacist	1.19649	1.17053	1.22347	0.179394	<.0001
Number of nurses	1.00815	1.00628	1.01003	0.00811572	<.0001
Number of physical therapists	1.00798	1.00246	1.01359	0.00794621	0.0047
Number of occupational therapists	1.00408	0.990293	1.0179	0.00407102	0.5615
Number of physicians	1.00294	0.998198	1.00777	0.00293817	0.2274
Number of speech-language-hearing therapists	0.991977	0.965506	1.0193	-0.0080553	0.5602
Number of nursing aides	0.988068	0.983691	0.992356	-0.0120042	<.0001
Number of assistant nurses	0.951145	0.944679	0.957468	-0.050089	<.0001
Table 1B
Year2022	Odds ratio	Lower 95% CI	Upper 95% CI	Estimate	p-value (Prob > Chi-Square)
Number of pharmacist	1.20366	1.17666	1.23185	0.18537	<.0001
Number of physical therapists	1.01078	1.00504	1.01663	0.010721	0.0002
Number of nurses	1.00903	1.00706	1.01101	0.00898404	<.0001
Number of speech-language-hearing therapists	1.0077	0.980432	1.03605	0.00767234	0.5865
Number of physicians	1.00135	0.99675	1.0061	0.00134826	0.5704
Number of occupational therapists	0.994953	0.98063	1.00861	-0.0050602	0.4847
Number of nursing aides	0.98545	0.980749	0.99006	-0.0146569	<.0001
Number of assistant nurses	0.953001	0.945887	0.959973	-0.0481398	<.0001
Table 1C
Year2023	Odds ratio	Lower 95% CI	Upper 95% CI	Estimate	p-value (Prob > Chi-Square)
Number of pharmacist	1.19524	1.1697	1.2219	0.178343	<.0001
Number of occupational therapists	1.00929	0.995446	1.02325	0.0092485	0.1878
Number of nurses	1.00813	1.00625	1.01003	0.00809991	<.0001
Number of physical therapists	1.00685	1.00132	1.01239	0.0068277	0.0148
Number of physicians	1.00432	0.999699	1.00905	0.00431185	0.0692
Number of speech-language-hearing therapists	0.991831	0.96533	1.0189	-0.0082027	0.5515
Number of nursing aides	0.984162	0.979689	0.988547	-0.0159652	<.0001
Number of assistant nurses	0.950314	0.943008	0.957465	-0.0509624	<.0001
OR = Odds Ratio; CI = Confidence Interval; Ph/100 beds = pharmacists per 100 beds.

## Sheet: Table2
	Table 2. Relationship Between Ward Pharmaceutical Care Fee I Filing Status and Ph/100 Beds and Number of Beds Nationwide
	Table 2A
		Year2021	Year2022	Year2023
	Total number of hospitals	6386	6064	5966
	Number of hospitals eligible to file WardPharm-1	5833	5512	5401
	Proportion of hospitals eligible to file WardPharm-1(%)	91.3	91	90.5
	Number of hospitals filing WardPharm-1	1820	1801	1856
	Proportion of WardPharm-1 filing hospitals(%)	31.2	32.7	34.4
						Table 2B	Year2021			Year2022			Year2023
							Number of hospitals	Pharmacists per 100 beds (persons)	Number of beds (beds)	Number of hospitals	Pharmacists per 100 beds (persons)	Number of beds (beds)	Number of hospitals	Pharmacists per 100 beds (persons)	Number of beds (beds)
						All WardPharm-1-eligible hospitals	5833	3.26(2.10-5.00)	126(70-224)	5512	3.33(2.14-5.00)	130(72.3-233)	5401	3.41(2.17-5.15)	135(76-240)
						WardPharm-1 hospitals	1820	5.24(3.92-6.71)	219(122-398)	1801	5.21(3.92-6.80)	220(125-395)	1856	5.24(3.92-6.96)	220(126-397)
						Cutoff value (Area Under the Curve)		3.72(0.84)	181(0.75)		3.95(0.83)	183(0.75)		3.73(0.83)	175(0.75)
						Non-filing hospitals	4013	2.58(1.83-3.75)	100(60-175)	3711	2.63(1.85-3.76)	102(60-177)	3545	2.63(1.86-3.85)	104(60-179)
						Ph/100 beds and the number of beds (excluding cutoff values [area under the curve]) are shown as median (interquartile range).
						AUC: Area Under the ROC Curve; WardPharm-1: Ward Pharmaceutical Care Fee I.
						There is no corresponding data in the cells with diagonal lines.

## Sheet: Table3
	Table 3. Trends in Ph/100 Beds and Number of Beds by Ward Pharmaceutical Care Fee I Filing Status(2021-2023)
	Table3A Pharmacists per 100 beds (persons)								Table3B Number of beds (beds)
	Year2021	Year2022	Year2023	Number of hospitals	Year2021	Year2022	Year2023		Year2021	Year2022	Year2023	Number of hospitals	Year2021	Year2022	Year2023
	Filed	Filed	Filed	1431	5.34(4.02-6.80)	5.33(4.04-6.93)	5.41(4.02-7.04)		Filed	Filed	Filed	1431	249(135-403)	247(135-403)	246(134-401)
	Filed	Filed	Not filed	54	4.88(2.97-5.52)	4.34(3.29-5.35)	4.11(2.82-4.98)		Filed	Filed	Not filed	54	198.5(111.75-324.25)	198(111.75-324.25)	198(112-324)
	Filed	Not filed	Filed	9	4.14(3.22-5.77)	4.55(3.04-6.19)	4.67(3.50-5.73)		Filed	Not filed	Filed	9	98(52-219.5)	98(52-212)	98(52-212)
	Filed	Not filed	Not filed	32	3.95(2.83-5.64)	3.38(2.66-4.47)	3.57(2.23-4.65)		Filed	Not filed	Not filed	32	135(56.25-242.5)	135(86.25-242.5)	135(86.3-242.5)
	Not filed	Not filed	Not filed	2740	2.56(1.85-3.67)	2.65(1.88-3.79)	2.64(1.89-3.85)		Not filed	Not filed	Not filed	2740	105(60-178.75)	103(60-175.75)	103(60-176.75)
	Not filed	Not filed	Filed	72	3.96(2.58-5.41)	4.17(2.71-5.31)	4.46(3.29-5.81)		Not filed	Not filed	Filed	72	198(120-288.5)	198.5(120.5-288.5)	198(120.5-280.5)
	Not filed	Filed	Filed	86	4.06(2.94-5.42)	4.53(3.26-5.59)	4.33(3.44-5.30)		Not filed	Filed	Filed	86	158.5(112.5-305.5)	156.5(112.5-305.5)	158(109.5-292)
	Not filed	Filed	Not filed	4	3.54(2.76-6.14)	4.34(2.50-9.11)	5.69(2.26-11.1)		Not filed	Filed	Not filed	4	101(59.25-392.5)	101(59.25-392.5)	59.5(44.75-372)
	Filed	Filed		1600	5.26(4.00-6.77)	5.24(4-6.81)			Filed	Filed		1600	228.5(127-400)	228.5(127.25-400)
	Filed	Not filed		48	3.99(3.02-5.64)	3.49(2.72-5)			Filed	Not filed		48	140.5(81.25-247.5)	136.5(81.25-247.5)
	Not filed	Not filed		3311	2.55(1.84-3.67)	2.63(1.86-3.78)			Not filed	Not filed		3311	101(60-176)	100(60-173)
	Not filed	Filed		101	4.04(2.94-5.43)	4.51(3.24-5.68)			Not filed	Filed		101	149(100-274)	149(100-274)
		Filed	Filed	1602		5.28(4.00-6.91)	5.31(4.00-7.03)			Filed	Filed	1602		234(131.75-400)	234(131-400)
		Filed	Not filed	61		4.35(3.06-5.40)	4.28(2.74-5.13)			Filed	Not filed	61		193(102.5-326.5)	193(102.5-326.5)
		Not filed	Filed	90		4.21(2.76-5.71)	4.55(3.32-5.82)			Not filed	Filed	90		197.5(120-300.5)	196.5(120-293.25)
		Not filed	Not filed	3025		2.63(1.88-3.77)	2.63(1.88-3.83)			Not filed	Not filed	3025		105(60-178)	105(60-178.5)
	Values are shown as median (interquartile range).								Values are shown as median (interquartile range).
	There is no corresponding data in the cells with diagonal lines.								There is no corresponding data in the cells with diagonal lines.

## Sheet: Table4
Table 4. Comparison by Hospital Regional Classification:Ward Pharmaceutical Care Fee I Filing, Pharmacists per 100 Beds, and Bed Scale (2021–2023)
		Year2021				Year2022				Year2023
		Number of hospitals	Filing rate(%)	Pharmacists per 100 beds (persons)	Number of beds (beds)	Number of hospitals	Filing rate(%)	Pharmacists per 100 beds (persons)	Number of beds (beds)	Number of hospitals	Filing rate(%)	Pharmacists per 100 beds (persons)	Number of beds (beds)
Metropolitan-type hospitals	WardPharm-1 hospitals	872	42.3	5.73(4.44-7.31)	218.5(117-400)	844	43.8	5.74(4.42-7.36)	216(117.25-392.75)	886	46.1	5.80(4.34-7.60)	221.5(120.75-400)
	Cutoff value (Area Under the Curve)			4.24(0.82)	203(0.74)			4.23(0.82)	182(0.73)			4.31(0.81)	182(0.73)
	Non-filing hospitals	1191		2.97(2.02-4.17)	107(60-175)	1084		2.95(2.00-4.17)	108(60-177)	1038		3.04(2.08-4.27)	110(60-180)
	All metropolitan-type hospitals	2063		4.03(2.56-6.03)	141(80-261)	1928		4.05(2.55-6.06)	143.5(82-270)	1924		4.17(2.67-6.26)	150(88-287)
Provincial city	WardPharm-1 hospitals	775	26.2	5.05(3.85-6.31)	240(145-404)	785	28	5.00(3.81-6.36)	238(142-405.5)	795	29.2	5.03(3.83-6.54)	230(137-401)
	Cutoff value (Area Under the Curve)			3.67(0.83)	175(0.77)			3.44(0.83)	175(0.77)			3.56(0.83)	175(0.77)
	Non-filing hospitals	2181		2.5(1.79-3.64)	100(60-177)	2019		2.60(1.85-3.70)	101(60-178)	1924		2.54(1.82-3.77)	101(60-177)
	All provincial city-type hospitals	2956		3.03(2.00-4.64)	122(67-220)	2804		3.16(2.06-4.70)	125(70-229.75)	2719		3.22(2.04-4.81)	128(71-230)
Depopulated	WardPharm-1 hospitals	173	21.3	4.00(3.08-5.01)	193(99-315.5)	172	22.1	3.98(3.13-5.01)	196(105-315.75)	175	23.1	4.02(3.14-5.11)	198(109-315)
	Cutoff value (Area Under the Curve)			3.01(0.81)	174(0.71)			3.01(0.81)	121(0.72)			3.01(0.81)	175(0.71)
	Non-filing hospitals	641		2.32(1.72-3.27)	99(58-170)	608		2.36(1.67-3.33)	100(60-255)	583		2.38(1.67-3.33)	100(60-173)
	All depopulated-area-type hospitals	814		2.63(1.86-3.68)	109(60-198)	780		2.68(1.85-3.78)	110(60.5-199)	758		2.78(1.91-3.93)	116.5(62.75-199)
All hospitals	WardPharm-1 hospitals	1820	31.2	5.24(3.92-6.71)	219(122-398)	1801	32.7	5.21(3.92-6.80)	220(125-395)	1856	34.4	5.24(3.92-6.96)	220(126-397)
	Cutoff value (Area Under the Curve)			3.72(0.84)	181(0.75)			3.95(0.83)	183(0.75)			3.73(0.83)	175(0.75)
	Non-filing hospitals	4013		2.58(1.83-3.75)	100(60-175)	3711		2.63(1.85-3.76)	102(60-177)	3545		2.63(1.86-3.85)	104(60-179)
	All hospitals	5833		3.26(2.10-5.00)	126(70-224)	5512		3.33(2.14-5.00)	130(72.3-233)	5401		3.41(2.17-5.15)	135(76-240)
Ph/100 beds and the number of beds (excluding cutoff values [area under the curve]) are shown as median (interquartile range).
AUC: Area Under the ROC Curve; WardPharm-1: Ward Pharmaceutical Care Fee I.
There is no corresponding data in the cells with diagonal lines.

## Sheet: Table5
Table 5. Comparison by Hospital Type:Ward Pharmaceutical Care Fee I Filing Rate, Pharmacists per 100 Beds, and Number of Beds (2021–2023)
		Year2021				Year2022				Year2023
		Number of hospitals	Filing rate(%)	Pharmacists per 100 beds (persons)	Number of beds (beds)	Number of hospitals	Filing rate(%)	Pharmacists per 100 beds (persons)	Number of beds (beds)	Number of hospitals	Filing rate(%)	Pharmacists per 100 beds (persons)	Number of beds (beds)
General hospitals	WardPharm-1 hospitals	1484	49.4	5.56(4.35-7.02)	275(138-419.75)	1479	51.5	5.54(4.30-7.07)	272(137-417)	1525	52.7	5.59(4.26-7.20)	272(139-416)
	Cutoff value (Area Under the Curve)			4.23(0.77)	166(0.78)			4.23(0.77)	131(0.78)			4.31(0.76)	166(0.77)
	Non-filing hospitals	1521		3.45(2.5-4.81)	80(48-180)	1394		3.50(2.5-4.76)	80(48-181.25)	1367		3.50(2.50-4.87)	88(50-189)
	All general hospitals	3005		4.53(3.09-6.15)	154(60-322)	2873		4.54(3.20-6.22)	160(60-325)	2892		4.59(3.23-6.33)	166(63-330)
Care-mix hospitals	WardPharm-1 hospitals	307	17.22	3.68(2.88-4.89)	157(110-200)	299	17.7	3.74(2.88-4.70)	154(110-200)	304	18.8	3.84(2.95-4.90)	159.5(112.25-199)
	Cutoff value (Area Under the Curve)			3.06(0.79)	112(0.60)			3.12(0.78)	109(0.59)			2.98(0.78)	104(0.60)
	Non-filing hospitals	1476		2.32(1.70-3.13)	128(92.25-188)	1389		2.36(1.72-3.21)	128(93-190.5)	1316		2.33(1.69-3.23)	130.5(94-192.75)
	All care-mix hospitals	1783		2.51(1.82-3.48)	134(96-194)	1688		2.56(1.85-3.52)	135(97-196)	1620		2.58(1.83-3.62)	140(98-197)
Long-term care hospitals	WardPharm-1 hospitals	29	2.8	3.92(2.74-4.75)	105(60-134.5)	23	2.4	4.24(2.93-5.89)	105(59-128)	27	3	3.92(2.50-5.89)	107(60-146)
	Cutoff value (Area Under the Curve)			2.50(0.82)	205(0.43)			2.80(0.82)	205(0.45)			2.34(0.79)	101(0.58)
	Non-filing hospitals	1016		2.02(1.47-2.86)	90(51-140.75)	928		2.06(1.5-3.03)	90(50-140)	862		2.08(1.54-3.10)	90(51-138)
	All long-term care hospitals	1045		2.06(1.49-2.94)	90(51-140.5)	951		2.08(1.52-3.08)	90(51-140)	889		2.11(1.56-3.18)	90(51-138)
All hospitals	WardPharm-1 hospitals	1820	31.2	5.24(3.92-6.71)	219(122-398)	1801	32.7	5.21(3.92-6.80)	220(125-395)	1856	34.4	5.24(3.92-6.96)	220(126-397)
	Cutoff value (Area Under the Curve)			3.72(0.84)	181(0.75)			3.95(0.83)	183(0.75)			3.73(0.83)	175(0.75)
	Non-filing hospitals	4013		2.58(1.83-3.75)	100(60-175)	3711		2.63(1.85-3.76)	102(60-177)	3545		2.63(1.86-3.85)	104(60-179)
	All hospitals	5833		3.26(2.10-5.00)	126(70-224)	5512		3.33(2.14-5.00)	130(72.3-233)	5401		3.41(2.17-5.15)	135(76-240)
Ph/100 beds and the number of beds (excluding cutoff values [area under the curve]) are shown as median (interquartile range).
AUC: Area Under the ROC Curve; WardPharm-1: Ward Pharmaceutical Care Fee I.
There is no corresponding data in the cells with diagonal lines.

## Sheet: Table6
Table 6. Comparison by DPC Functional Category: Ward Pharmaceutical Care Fee I Filing Rate, Pharmacists per 100 Beds, and Number of Beds (2021–2023)
		Year2021				Year2022				Year2023
		Number of hospitals	Filing rate(%)	Pharmacists per 100 beds (persons)	Number of beds (beds)	Number of hospitals	Filing rate(%)	Pharmacists per 100 beds (persons)	Number of beds (beds)	Number of hospitals	Filing rate(%)	Pharmacists per 100 beds (persons)	Number of beds (beds)
DPC university hospital main group	WardPharm-1 hospitals	76	93.8	7.68(6.76-8.44)	831(658.25-998)	76	95	7.64(6.91-8.71)	831(658.3-998)	75	94.9	7.74(6.98-9.11)	845(674-990)
	Cutoff value (Area Under the Curve)			4.81(0.82)	632(0.52)			6.86(0.94)	618(0.59)			4.89(0.76)	1160(0.50)
	Non-filing hospitals	5		4.13(3.14-7.44)	800(513-1157)	4		4.73(3.14-6.46)	707.5(615-1086.5)	4		4.47(2.95-8.56)	825(661.3-1099)
	All DPC university hospital main group	81		7.57(6.71-8.35)	830(648.5-1009)	80		7.50(6.84-8.60)	828.5(646.25-998)	79		7.73(6.96-9.11)	845(674-990)
DPC specified hospital group	WardPharm-1 hospitals	141	88.1	6.71(5.44-7.80)	578(480-685.5)	153	92.2	6.84(5.63-7.97)	565(457.5-676)	159	91.4	6.97(5.71-7.95)	570(470-680)
	Cutoff value (Area Under the Curve)			5.20(0.69)	473(0.53)			6.28(0.78)	852(0.46)			5.50(0.71)	628(0.59)
	Non-filing hospitals	19		5.16(3.94-6.70)	615(402-676)	13		4.96(4.23-5.97)	630(450.5-704.5)	15		5.43(4.92-7.00)	647(460-733)
	All DPC specified hospital group	160		6.58(5.25-7.73)	584.5(474-685)	166		6.59(5.51-7.90)	570(458.75-677)	174		6.92(5.60-7.94)	576.5(467.75-684)
DPC standard hospital group	WardPharm-1 hospitals	963	64.7	5.46(4.39-6.73)	300(195-399)	947	65.5	5.4(4.34-6.8)	296(191-388)	974	66.3	5.53(4.31-6.97)	292(195-393)
	Cutoff value (Area Under the Curve)			4.23(0.80)	285(0.62)			4.27(0.78)	285(0.61)			4.03(0.78)	272(0.61)
	Non-filing hospitals	526		3.44(2.58-4.54)	220(148-324.25)	498		3.57(2.63-4.52)	220(150-317)	494		3.64(2.51-4.73)	218.5(146.8-322)
	All DPC standard hospital group	1489		4.81(3.52-6.20)	267(179-375.5)	1445		4.76(3.54-6.23)	262(176.5-367.5)	1468		4.88(3.60-6.35)	263(179-370.75)
non-DPC hospitals	WardPharm-1 hospitals	640	15.6	4.04(3.03-5.50)	110(72-167.75)	625	16.4	4.07(3.06-5.49)	112(73-169)	648	17.6	4.10(3.07-5.45)	115(72-171.8)
	Cutoff value (Area Under the Curve)			2.66(0.77)	83(0.58)			2.95(0.77)	93(0.58)			2.93(0.76)	93(0.57)
	Non-filing hospitals	3463		2.47(1.75-3.51)	96(56-150)	3196		2.5(1.78-3.56)	97(56-150)	3032		2.5(1.79-3.61)	98(58-152)
	All non-DPC hospitals	4103		2.67(1.86-3.93)	99(59-152)	3821		2.75(1.90-3.95)	99(59-153)	3680		2.78(1.94-4.00)	99(60-156)
All hospitals	WardPharm-1 hospitals	1820	31.2	5.24(3.92-6.71)	219(122-398)	1801	32.7	5.21(3.92-6.80)	220(125-395)	1856	34.4	5.24(3.92-6.96)	220(126-397)
	Cutoff value (Area Under the Curve)			3.72(0.84)	181(0.75)			3.95(0.83)	183(0.75)			3.73(0.83)	175(0.75)
	Non-filing hospitals	4013		2.58(1.83-3.75)	100(60-175)	3711		2.63(1.85-3.76)	102(60-177)	3545		2.63(1.86-3.85)	104(60-179)
	All hospitals	5833		3.26(2.10-5.00)	126(70-224)	5512		3.33(2.14-5.00)	130(72.3-233)	5401		3.41(2.17-5.15)	135(76-240)
Ph/100 beds and the number of beds (excluding cutoff values [area under the curve]) are shown as median (interquartile range).
AUC: Area Under the ROC Curve; WardPharm-1: Ward Pharmaceutical Care Fee I.
There is no corresponding data in the cells with diagonal lines.
